# Supplementary material for: Clinical Outcome between Ticagrelor versus Clopidogrel in Patients with Acute Coronary Syndrome and Diabetes
Source: Hindawi journal article supplement (doi:10.1155/2021/5546260), 2021-10-15
Supplement: f1 [file 5546260.f1.pdf]

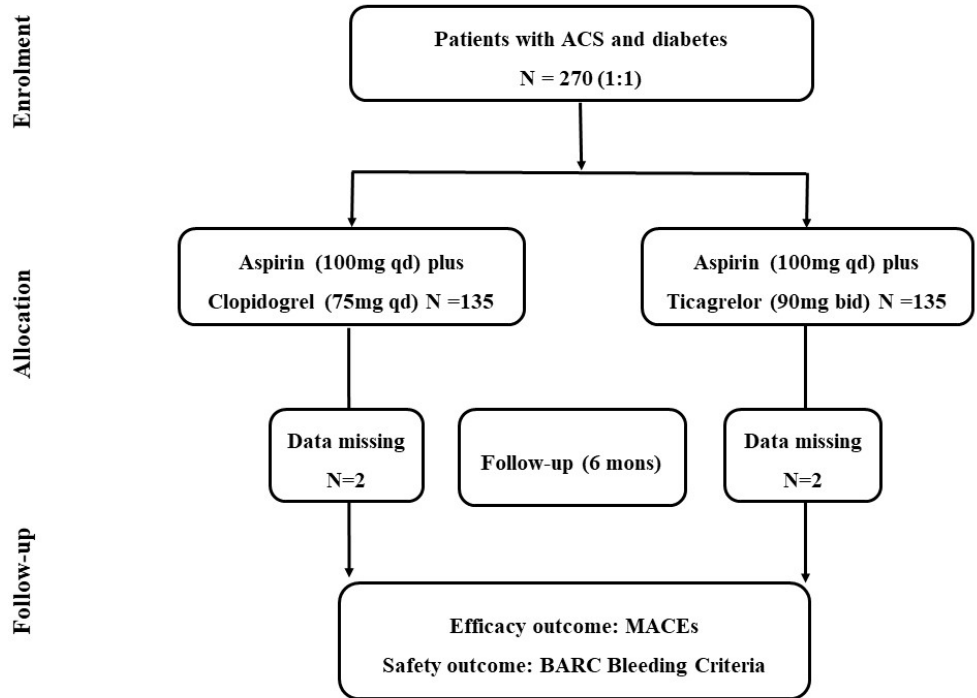

SUPPLEMENTAL FIGURE 1: Flow chart of the study.

SUPPLEMENTAL TABLE 1: Risk factors for the composite efficacy outcomes of ACS patients with diabetes in univariable analysis.

| Variable                             | Univariable       | P1    | Univariable      | P2    |
|--------------------------------------|-------------------|-------|------------------|-------|
|                                      | OR (95% CI)       | value | OR (95% CI)      | value |
| Age, years                           | 1.06 (1.01-1.11)  | 0.012 | 1.06 (1.01-1.11) | 0.013 |
| Gender (male vs female)              | 0.80 (0.40-1.60)  | 0.527 | 0.83 (0.44-1.56) | 0.558 |
| BMI, kg/m <sup>2</sup>               | 0.94 (0.85-1.05)  | 0.290 | 0.95 (0.86-1.05) | 0.315 |
| Current smoking                      | 0.82 (0.42-1.59)  | 0.556 | 0.85 (0.46-1.56) | 0.594 |
| Current drinking                     | 0.83 (0.42-1.66)  | 0.606 | 0.86 (0.46-1.63) | 0.643 |
| History                              |                   |       |                  |       |
| Hypertension                         | 2.37 (1.04-5.36)  | 0.039 | 2.20 (1.02-4.77) | 0.045 |
| Ischemic stroke                      | 2.24 (0.82-6.11)  | 0.116 | 2.00 (0.84-4.74) | 0.119 |
| Hyperlipemia                         | 0.35 (0.12-1.03)  | 0.057 | 0.38 (0.13-1.06) | 0.063 |
| Previous MI                          | 1.86 (0.77-4.45)  | 0.166 | 1.87 (0.86-4.04) | 0.114 |
| Liver insufficiency                  | 5.07 (1.47-17.48) | 0.010 | 3.81 (1.50-7.72) | 0.005 |
| Chronic kidney disease               | 1.44 (0.55-3.76)  | 0.462 | 1.46 (0.61-3.46) | 0.395 |
| Previous GI bleeding                 | 0.78 (0.09-6.50)  | 0.817 | 0.81 (0.11-5.86) | 0.830 |
| Hyperuricemia                        | 2.10 (0.64-6.96)  | 0.223 | 2.01 (0.72-5.65) | 0.184 |
| Previous coronary stent implantation | 1.19 (0.51-2.78)  | 0.686 | 1.24 (0.57-2.69) | 0.581 |
| Medication                           |                   |       |                  |       |
| Proton pump inhibitors               | 1.30 (0.66-2.56)  | 0.455 | 1.23 (0.66-2.31) | 0.514 |
| Insulin                              | 1.34 (0.68-2.63)  | 0.405 | 1.30 (0.70-2.41) | 0.413 |

|                                      |                   |       |                   |       |
|--------------------------------------|-------------------|-------|-------------------|-------|
| Metformin                            | 0.66 (0.33-1.31)  | 0.235 | 0.67 (0.35-1.26)  | 0.208 |
| Beta blockers                        | 0.60 (0.29-1.22)  | 0.159 | 0.65 (0.34-1.24)  | 0.194 |
| Statins                              | 0.54 (0.06-5.33)  | 0.598 | 0.65 (0.09-4.72)  | 0.670 |
| RAAS inhibitors                      | 1.21 (0.56-2.62)  | 0.623 | 1.16 (0.57-2.36)  | 0.688 |
| Biomedical indicator                 |                   |       |                   |       |
| Leucocyte                            | 1.09 (0.95-1.25)  | 0.201 | 1.08 (0.96-1.22)  | 0.194 |
| Hemoglobin                           | 0.99 (0.97-1.00)  | 0.032 | 0.99 (0.98-1.00)  | 0.020 |
| Platelets                            | 1.00 (0.99-1.00)  | 0.419 | 1.00 (0.99-1.00)  | 0.438 |
| Mean platelet volume                 | 0.98 (0.80-1.20)  | 0.861 | 0.99 (0.82-1.19)  | 0.877 |
| Platelet distribution width          | 0.94 (0.83-1.06)  | 0.294 | 0.94 (0.84-1.05)  | 0.258 |
| ALT                                  | 1.01 (1.00-1.02)  | 0.092 | 1.01 (1.00-1.02)  | 0.070 |
| eGFR                                 | 0.98 (0.96-0.99)  | 0.005 | 0.98 (0.97-0.99)  | 0.001 |
| Triglyceride                         | 0.87 (0.63-1.20)  | 0.396 | 0.88 (0.65-1.19)  | 0.405 |
| Total cholesterol                    | 0.75 (0.53-1.06)  | 0.105 | 0.77 (0.55-1.06)  | 0.108 |
| Glycosylated hemoglobin              | 0.92 (0.73-1.16)  | 0.483 | 0.91 (0.73-1.14)  | 0.426 |
| Coronary arteriography               |                   |       |                   |       |
| Single-vessel disease                | ref               | 0.113 | ref               | 0.105 |
| Double-vessel disease                | 2.00 (0.54-7.35)  | 0.297 | 1.95 (0.56-6.79)  | 0.294 |
| Triple-vessel disease                | 3.28 (0.94-11.54) | 0.064 | 3.11 (0.94-10.34) | 0.064 |
| Grouping (ticagrelor vs clopidogrel) | 0.84 (0.43-1.64)  | 0.611 | 0.87 (0.47-1.61)  | 0.656 |

---

95% CI, 95% confidence interval; OR, Odds ratio; P1, Logistic regression analysis; P2, COX survival analysis;

BMI, Body mass index; MI, Myocardial infarction; GI, Gastrointestinal; RAAS, Renin-angiotensin-aldosterone system; ALT, Alanine aminotransferase; eGFR, Estimated glomerular filtration rate.

SUPPLEMENTAL TABLE 2: Risk factors for the bleeding events defined with BARC criteria of ACS patients with diabetes in univariable analysis.

| Variable                             | Univariable      | P1    | Univariable      | P2    |
|--------------------------------------|------------------|-------|------------------|-------|
|                                      | OR (95% CI)      | value | OR (95% CI)      | value |
| Age, years                           | 0.97 (0.94-1.00) | 0.067 | 0.97 (0.95-1.00) | 0.081 |
| Gender (male vs female)              | 0.91 (0.48-1.73) | 0.777 | 0.93 (0.53-1.63) | 0.797 |
| BMI, kg/m <sup>2</sup>               | 1.01 (0.97-1.05) | 0.780 | 1.00 (0.97-1.04) | 0.798 |
| Current smoking                      | 1.20 (0.65-2.20) | 0.558 | 1.16 (0.67-2.00) | 0.595 |
| Current drinking                     | 0.79 (0.43-1.48) | 0.468 | 0.81 (0.46-1.41) | 0.448 |
| History                              |                  |       |                  |       |
| Hypertension                         | 1.23 (0.64-2.36) | 0.531 | 1.19 (0.66-2.14) | 0.559 |
| Ischemic stroke                      | 0.88 (0.29-2.73) | 0.831 | 0.91 (0.33-2.53) | 0.859 |
| Hyperlipemia                         | 1.42 (0.71-2.85) | 0.324 | 1.38 (0.75-2.54) | 0.305 |
| Previous MI                          | 0.84 (0.33-2.16) | 0.722 | 0.78 (0.84-1.96) | 0.679 |
| Liver insufficiency                  | 1.54 (0.39-6.01) | 0.536 | 1.57 (0.49-5.03) | 0.449 |
| Chronic kidney disease               | 0.41 (0.12-1.42) | 0.160 | 0.44 (0.14-1.40) | 0.164 |
| Previous GI bleeding                 | 0.57 (0.07-4.70) | 0.598 | 0.57 (0.08-4.11) | 0.575 |
| Hyperuricemia                        | 0.60 (0.13-2.76) | 0.515 | 0.60 (0.15-2.47) | 0.497 |
| Previous coronary stent implantation | 1.33 (0.63-2.84) | 0.458 | 1.24 (0.64-2.40) | 0.531 |
| Medication                           |                  |       |                  |       |
| Proton pump inhibitors               | 1.27 (0.69-2.35) | 0.438 | 1.22 (0.70-2.11) | 0.484 |
| Insulin                              | 1.36 (0.74-2.52) | 0.326 | 1.29 (0.75-2.23) | 0.360 |

|                                      |                   |       |                    |       |
|--------------------------------------|-------------------|-------|--------------------|-------|
| Metformin                            | 1.01 (0.55-1.85)  | 0.978 | 1.01 (0.59-1.74)   | 0.960 |
| Beta blockers                        | 0.73 (0.38-1.43)  | 0.359 | 0.73 (0.41-1.32)   | 0.302 |
| Statins                              | 0.74 (0.08-7.29)  | 0.799 | 0.82 (0.11-5.96)   | 0.848 |
| RAAS inhibitors                      | 0.82 (0.42-1.59)  | 0.562 | 0.83 (0.46-1.49)   | 0.521 |
| Biomedical indicators                |                   |       |                    |       |
| Leucocyte                            | 0.99 (0.86-1.13)  | 0.861 | 0.99 (0.87-1.12)   | 0.814 |
| Hemoglobin                           | 1.00 (0.98-1.00)  | 0.746 | 1.00 (0.99-1.01)   | 0.730 |
| Platelets                            | 1.00 (1.00-1.01)  | 0.727 | 1.00 (1.00-1.00)   | 0.871 |
| Mean platelet volume                 | 1.07 (0.89-1.28)  | 0.492 | 1.07 (0.91-1.25)   | 0.450 |
| Platelet distribution width          | 0.94 (0.84-1.05)  | 0.246 | 0.95 (0.86-1.04)   | 0.256 |
| ALT                                  | 1.00 (0.98-1.01)  | 0.631 | 1.00 (0.99-1.01)   | 0.675 |
| eGFR                                 | 1.01 (0.99-1.03)  | 0.204 | 1.01 (1.00-1.03)   | 0.195 |
| Triglyceride                         | 0.87 (0.63-1.20)  | 0.160 | 1.14 (0.99-1.31)   | 0.063 |
| Total cholesterol                    | 0.96 (0.73-1.26)  | 0.781 | 0.97 (0.75-1.26)   | 0.822 |
| Glycosylated hemoglobin              | 1.04 (0.85-1.28)  | 0.680 | 1.03 (0.86-1.24)   | 0.727 |
| Coronary arteriography               |                   |       |                    |       |
| Single-vessel disease                | ref               | 0.613 | ref                | 0.655 |
| Double-vessel disease                | 1.59 (0.60-4.25)  | 0.355 | 1.48 (0.60-3.64)   | 0.399 |
| Triple-vessel disease                | 1.60 (0.61-4.21)  | 0.345 | 1.50 (0.62-3.66)   | 0.371 |
| Grouping (ticagrelor vs clopidogrel) | 1.69 (0.92 -3.12) | 0.093 | 1.70 (0.98 - 2.95) | 0.059 |

---

95% CI, 95% confidence interval; OR, Odds ratio; P1, Logistic regression analysis; P2, COX survival analysis;

BMI, Body mass index; MI, Myocardial infarction; GI, Gastrointestinal; RAAS, Renin-angiotensin-aldosterone system; ALT, Alanine aminotransferase; eGFR, Estimated glomerular filtration rate.
